# Supplementary material
Source: MDPI journal article supplement (https://www.mdpi.com/search?q=atmosphere-11-01191)
Supplement: s001 [file atmosphere-11-01191-s001.pdf]

# Development of a Method to Determine the Fractional Deposition Efficiency of Full-Scale HVAC and HEPA Filter Cassettes for Nanoparticles $\geq 3.5$ nm

Ana Maria Todea <sup>1,\*</sup>, Frank Schmidt <sup>2</sup>, Tobias Schuldt <sup>2</sup> and Christof Asbach <sup>1</sup>

<sup>1</sup> Air Quality & Filtration Unit, Institut für Energie-und Umwelttechnik e. V. (IUTA), 47229 Duisburg, Germany; asbach@iuta.de

<sup>2</sup> Nanoparticle Process Technology, Faculty of Engineering, University of Duisburg-Essen, 47057 Duisburg, Germany; frank.schmidt@uni-due.de (F.S.); tobias.schuldt@uni-due.de (T.S.)

\* Correspondence: todea@iuta.de

Received: 06 October 2020; Accepted: 28 October 2020; Published: 3 November 2020

The spatial homogeneity of the particle concentration across the cross section of the test rig in the filter plane has been measured, using a frame with an open area of 610 mm  $\times$  610 mm. The frame includes three sampling tubes, sticking in from the side at a level of 102 mm, 305 mm and 508 mm from the top, respectively. These tubes include a 90° bend at the inner end to sample in flow direction and can be freely moved in horizontal direction. To determine the spatial homogeneity of the particle concentration, it has been measured in a matrix of up to nine position as specified in Figure S1a. The concentrations were measured in all nine positions for a flow rate of 1700 m<sup>3</sup>/h (Figure S1b) and exemplarily for four positions (Pos. 1, 3, 5 and 8) for flow rates of 3400 m<sup>3</sup>/h and 4250 m<sup>3</sup>/h (Figure S1c and Figure S1d). During all filter tests presented here, particle size distributions and/or concentrations were determined in the center point (Pos. 5). Therefore, Pos. 5 is used as the reference point in Figure S1. Percentages given in Figure S1 hence refer to the deviation of the concentrations measured in comparison with the one in Pos. 5.

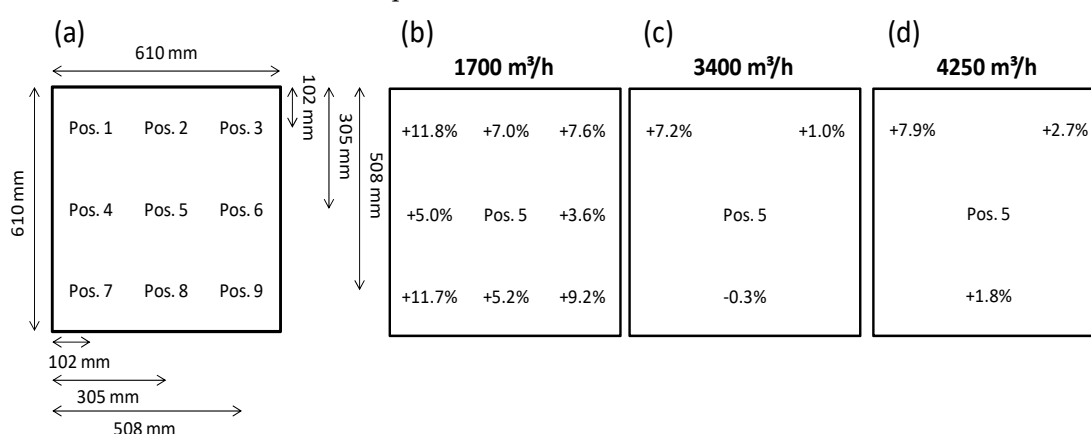

**Figure S1.** Determination of the spatial homogeneity of the particle concentration in the test rig; (a) matrix of nine spatially distributed measurement positions, view in flow direction; (b) deviations of the number concentrations measured in comparison to Pos. 5 at a flow rate of 1700 m<sup>3</sup>/h; (c) deviations of the number concentrations measured in comparison to Pos. 5 at a flow rate of 3400 m<sup>3</sup>/h; (d) deviations of the number concentrations measured in comparison to Pos. 5 at a flow rate of 4250 m<sup>3</sup>/h.

The data in Figure S1 show that the homogeneity is higher for the higher flow rates with max. deviations of +7.2% and +7.9% for 3400 m<sup>3</sup>/h and 4250 m<sup>3</sup>/h, respectively, whereas in case of 1700 m<sup>3</sup>/h the deviation was up to +11.8% in the top left position (Pos. 1).

**Table S1.** Parameters of the lognormal size distributions of the generated test aerosols for different settings.

| Flow rate test rig<br>[m <sup>3</sup> /h] | NaCl Solution<br>[g/l] | Solution feed rate<br>[ml/h] | Punched<br>plate | Mode<br>[nm] | GSD  | Number Conc.<br>[1/cm <sup>3</sup> ] |
|-------------------------------------------|------------------------|------------------------------|------------------|--------------|------|--------------------------------------|
| 3400                                      | 0.5                    | 30                           | none             | 4.4          | 1.29 | 1.7x10 <sup>7</sup>                  |
|                                           | 0.5                    | 40                           | none             | 4.6          | 1.29 | 2.3x10 <sup>7</sup>                  |
|                                           | 0.5                    | 50                           | none             | 4.8          | 1.30 | 2.6x10 <sup>7</sup>                  |
|                                           | 0.5                    | 90                           | none             | 5.3          | 1.28 | 3.2x10 <sup>7</sup>                  |
|                                           | 1                      | 90                           | none             | 6.2          | 1.35 | 4.1x10 <sup>7</sup>                  |
|                                           | 10                     | 90                           | none             | 13.3         | 1.46 | 5.5x10 <sup>7</sup>                  |
|                                           | 50                     | 90                           | none             | 21.3         | 1.50 | 5.2x10 <sup>7</sup>                  |
|                                           | 10                     | 50                           | 25 holes         | 38.5         | 1.44 | 1.5x10 <sup>6</sup>                  |
|                                           | 20                     | 90                           | 25 holes         | 53.3         | 1.39 | 1.4x10 <sup>6</sup>                  |
|                                           | 80                     | 90                           | 25 holes         | 79.1         | 1.40 | 1.3x10 <sup>6</sup>                  |
| 4250                                      | 5                      | 90                           | 48 holes         | 20.2         | 1.45 | 7.0x10 <sup>6</sup>                  |
|                                           | 0.5                    | 30                           | none             | 3.5          | 1.24 | 2.3x10 <sup>7</sup>                  |
|                                           | 0.5                    | 40                           | none             | 3.8          | 1.25 | 3.4x10 <sup>7</sup>                  |
|                                           | 0.5                    | 50                           | none             | 4.1          | 1.27 | 3.9x10 <sup>7</sup>                  |
|                                           | 0.5                    | 90                           | none             | 4.6          | 1.30 | 5.3x10 <sup>7</sup>                  |
|                                           | 1                      | 90                           | none             | 5.1          | 1.31 | 6.7x10 <sup>7</sup>                  |
|                                           | 10                     | 90                           | none             | 9.6          | 1.46 | 8.1x10 <sup>7</sup>                  |
|                                           | 50                     | 90                           | none             | 15.7         | 1.58 | 6.7x10 <sup>7</sup>                  |
|                                           | 10                     | 50                           | 25 holes         | 33.4         | 1.45 | 1.9x10 <sup>6</sup>                  |
|                                           | 20                     | 90                           | 25 holes         | 47.8         | 1.40 | 1.8x10 <sup>6</sup>                  |
|                                           | 80                     | 90                           | 25 holes         | 68.5         | 1.39 | 1.7x10 <sup>6</sup>                  |
|                                           | 5                      | 90                           | 48 holes         | 20.2         | 1.47 | 6.6x10 <sup>6</sup>                  |

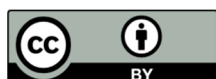

© 2020 by the authors. Submitted for possible open access publication under the terms and conditions of the Creative Commons Attribution (CC BY) license (<http://creativecommons.org/licenses/by/4.0/>).
